# 1      **Reference-based QUantification Of gene**

## 2                      **Dispensability (QUOD)**

3

4Katharina Sielemann<sup>1,2</sup>, Bernd Weisshaar<sup>1,\*</sup> and Boas Pucker<sup>1,3</sup>

6<sup>1</sup>Genetics and Genomics of Plants, Center for Biotechnology (CeBiTec) & Faculty of  
7Biology, Bielefeld University, 33615 Bielefeld, Germany

8<sup>2</sup>Graduate School DILS, Bielefeld Institute for Bioinformatics Infrastructure (BIBI),  
9Bielefeld University, 33615 Bielefeld, Germany

10<sup>3</sup>Evolution and Diversity, Department of Plant Sciences, University of Cambridge,  
11Cambridge, UK

12\*Correspondence: [bernd.weisshaar@uni-bielefeld.de](mailto:bernd.weisshaar@uni-bielefeld.de)

13

14Email addresses:

15[kfrey@cebitec.uni-bielefeld.de](mailto:kfrey@cebitec.uni-bielefeld.de)

16[bpucker@cebitec.uni-bielefeld.de](mailto:bpucker@cebitec.uni-bielefeld.de)

17[bernd.weisshaar@uni-bielefeld.de](mailto:bernd.weisshaar@uni-bielefeld.de)

18

19

## 20 **Abstract**

## 21 **Background**

22 Dispensability of genes in a phylogenetic lineage, e.g. a species, genus, or higher-  
23 level clade, is gaining relevance as most genome sequencing projects move to a  
24 pangenome level. Most analyses classify genes as core genes, which are present in  
25 all investigated individual genomes, and dispensable genes, which only occur in a  
26 single or a few investigated genomes. The binary classification as 'core' or  
27 'dispensable' is often based on arbitrary cutoffs of presence/absence in the analysed  
28 genomes. Even when extended to 'conditionally dispensable', this concept still  
29 requires the assignment of genes to distinct groups.

## 30 **Results**

31 Here, we present a new method which overcomes this distinct classification by  
32 quantifying gene dispensability and present a dedicated tool for reference-based  
33 QUantification Of gene Dispensability (QUOD). As a proof of concept, sequence data  
34 of 966 *Arabidopsis thaliana* accessions (Ath-966) were processed to calculate a  
35 gene-specific dispensability score for each gene based on normalised coverage in  
36 read mappings. We validated this score by comparison of highly conserved  
37 Benchmarking Universal Single Copy Orthologs (BUSCOs) to all other genes. The  
38 average scores of BUSCOs were significantly lower than the scores of non-BUSCOs.  
39 Analysis of variation demonstrated lower variation values between replicates of a  
40 single accession than between iteratively, randomly selected accessions from the  
41 whole dataset Ath-966. Functional investigations revealed defense and antimicrobial  
42 response genes among the genes with high-dispensability scores.

## 43 **Conclusions**

44 Instead of classifying a gene as core or dispensable, QUOD assigns a dispensability  
45 score to each gene. Hence, QUOD facilitates the identification of candidate  
46 dispensable genes, associated with high dispensability scores, which often underlie  
47 lineage-specific adaptation to varying environmental conditions.

48

49

## 50 **Keywords**

51 pangenomics, genomics, dispensability, bioinformatics, bioinformatic tool,  
52 presence/absence variations

53

54

## 55 **Background**

56 Genetic variation is not restricted to single nucleotide polymorphisms or small  
57 insertions and deletions but extends also to (large) structural variations. These  
58 structural variations include copy number variations (CNVs) and presence/absence  
59 variations (PAVs), which can cause substantial variation of the gene content among  
60 individual genomes (1,2). The comparative analysis of multiple genomes of the same  
61 phylogenetic clade allows the identification of PAVs that are connected to phenotypic  
62 traits. In the case of crop species, the identification of PAVs underlying specific  
63 agronomic traits which only occur in a single or a few species is feasible (3–5). As  
64 more highly contiguous genome sequences become available, pangenomes are  
65 suitable to describe and investigate the gene set diversity of a biological clade, e.g.  
66 species, genus or higher (6,7).

67 Genes of a pangenome are thought to be divided into a core and a dispensable gene  
68 set, the latter is also often referred to as ‘accessory’ in the literature. Core genes  
69 occur in all investigated genomes, whereas dispensable genes only occur in a single  
70 or a few genomes (8). In eukaryotic pangenome studies, core and dispensable genes  
71 are mostly identified based on sequence similarity e.g. using GET\_HOMOLOGUES-  
72 EST Markov clustering (9), OrthoMCL gene family clustering (10) or BLASTN (11).  
73 Sometimes, a third category of ‘conditionally dispensable’ genes is invoked (12) or  
74 genes might be classified as ‘cloud’, ‘shell’, ‘soft-core’ and ‘core’ (13) or even as  
75 ‘core’, ‘softcore’, ‘dispensable’ and ‘private’ (14). However, this distinct classification  
76 is not based on the biological dispensability of genes and relies on one or multiple  
77 arbitrary cutoffs. Some studies consider genes as ‘core’ if these genes occur in at  
78 least 90 % of the investigated genomes (11); in other studies, only genes which are  
79 found in all genomes are part of the core genome (10). In addition, dependency  
80 groups might influence the dispensability of certain genes. The possibility that two  
81 genes might be ‘replaced’ by a specific number of other genes has to be considered.  
82 Some genes, of e.g. a gene family, might be required in a specific proportion and  
83 therefore are only conditionally dispensable (12). Further, assemblies of genomes or  
84 transcriptomes might be incomplete leading to artificially missing genes (15). One  
85 way to circumvent this is to rely only on high-quality reference genome sequences,  
86 thus avoiding additional assemblies which are potential sources of errors.

87 Here, we present QUOD - a bioinformatic tool to quantify gene dispensability. An *A.*  
88 *thaliana* dataset of about 1,000 accessions was used to calculate a per gene  
89 dispensability score derived from the coverage of all genes in the given genomes.  
90 This score was validated by comparison of scores of BUSCOs and the functional  
91 investigation of genes with high-dispensability scores. Our tool is easy to use for all

92kinds of plant species. QUOD extends the distinct classification of genes as ‘core’  
93and ‘dispensable’ based on an arbitrary threshold to a continuous dispensability  
94score.

95

96

## 97**Methods**

### 98**Selection and preprocessing of datasets**

99Genomic reads (FASTQ format) of the investigated genomes were retrieved from the  
100Sequence Read Archive (SRA) (16) via fastq-dump. BWA-MEM (v.0.7.13) (17) was  
101applied to map all genomic paired-end Illumina reads to the corresponding reference  
102genome sequence using default parameters as well as *-m* to discard secondary  
103alignments. For *A. thaliana*, all available 1,135 datasets (18) (Additional file 1) were  
104subjected to a mapping against the AthNd-1\_v2c genome sequence (19). The  
105resulting BAM files of these mappings were subjected to QUOD.

106

### 107**Calculation of gene dispensability scores – QUOD**

108QUOD calculates a reference-based gene dispensability score for each structurally  
109annotated gene based on supplied mapping files (BAM) (one per investigated  
110genome) and a structural annotation of the reference sequence (GFF)  
111(<https://github.com/ksielemann/QUOD>). The tool is written in Python3 and consists of  
112six different components (Additional file 2). During the first part of the analysis, the  
113read coverage per position (I) as well as the read coverage per gene (II) are  
114calculated. In the next step, genomes with an average coverage below a given cutoff

115(default=10) are discarded and excluded from further analyses (III). Finally, an input  
116matrix is constructed (IV) and a dispensability score is determined for each gene (V).  
117QUOD assigns high gene dispensability scores to more likely dispensable genes.  
118Optionally, the results can be visualized as a colored histogram and a box plot (VI).  
119The dispensability score ( $ds(g)$ ) is calculated as follows (cov.=coverage):

$$120 \text{ dispensability score (gene } g) = 1 / \left[ \frac{\sum_{n=1}^N \left( \frac{\text{average cov. of gene } g \text{ in genome } n}{\text{average cov. over all genes in genome } n} \right)}{\text{total number of genomes (N)}} \right]$$

121

## 122 **Comprehension of the dispensability score composition**

123For further investigation of the score composition of selected genes of interest, the  
124script `'score_composition.py'` can be used  
125([https://github.com/ksielemann/QUOD/blob/master/score\\_composition.py](https://github.com/ksielemann/QUOD/blob/master/score_composition.py)). As output,  
126a table including (I) the dispensability score, (II) the average coverage of all  
127investigated genome sequences, (III) the average coverage of the accessions with  
128the highest and (IV) lowest 10 % of all coverage values, respectively, (V) the number  
129of accessions with zero coverage and (VI) the coverage for each accession,  
130separately, is provided. Further, the coverage distribution for each gene can be  
131visualized in a box plot.

132

## 133 **Identification of plastid sequences**

134Genes of Ath-966 with high similarity to plastid sequences were flagged via BLASTp  
135(20) of the encoded peptides against all organelle peptide sequences obtained from  
136the National Center for Biotechnology Information (NCBI). As a control, the

137sequences were also searched against themselves. Peptide sequences of Nd-1 with  
138a score ratio  $\geq 0.8$  were considered plastid-like sequences when comparing BLAST  
139hits against self-hits (19).

140

#### 141**Score comparison between contrasting gene sets**

142Genes structurally annotated in AthNd-1\_v2c were classified with BUSCO v3 (21)  
143running in protein mode on the encoded peptide sequences using ‘brassicales  
144odb10’ (order level) as reference (22). For comparison, BUSCO was additionally  
145executed using ‘chlorophyta odb10’ (phylum level) and ‘embryophyta odb10’ (clade  
146level) as reference. BUSCOs include single-copy genes and universal genes which  
147are present in  $> 90\%$  of all species in the reference dataset and are used to measure  
148the completeness of assemblies and annotations (21). The scores of BUSCO and  
149non-BUSCO genes were compared using matplotlib (23) for visualization (violin plot)  
150and a Mann–Whitney U test implemented in the Python package dabest (24) for  
151determination of the significance ([https://github.com/ksielemann/QUOD/blob/master/  
152BUSCO\\_comparison.py](https://github.com/ksielemann/QUOD/blob/master/BUSCO_comparison.py)). Further, a Levene’s test, implemented in the Python  
153package SciPy (25), was calculated to test for equal variances among BUSCO genes  
154and non-BUSCO genes. The dispensability score of non-BUSCO genes might  
155deviate more from the mean as non-BUSCO genes might be less conserved  
156compared to BUSCO genes and might include multi-copy genes. Note that for all  
157analyses performed within this study, the score of the size ‘infinity’ (detected for one  
158gene) was set to the next highest score to enable calculations.

159A list of Nd-1 transposable element (TE) genes, which are Nd-1 gene structures  
160overlapping with sequences annotated as TEs, was obtained from Pucker *et al.* (19).

161 First, the score distribution of TE and non-TE genes was determined using a Mann–  
162 Whitney U test implemented in the Python package SciPy (25)  
163 ([https://github.com/ksielemann/QUOD/blob/master/analyse\\_TE\\_genes\\_and\\_scores.p](https://github.com/ksielemann/QUOD/blob/master/analyse_TE_genes_and_scores.p)  
164 y). Next, the minimal distance of each gene to its closest TE gene was calculated  
165 after extracting the gene positions from the Nd-1 annotation file. Mixed linear  
166 modelling was performed using Statsmodels v0.12.0 (26) to determine the interaction  
167 between the distance to the closest TE gene and the gene dispensability score  
168 ([https://github.com/ksielemann/QUOD/blob/master/mixed\\_linear\\_effects.py](https://github.com/ksielemann/QUOD/blob/master/mixed_linear_effects.py)).

169

#### 170 **Correlation of gene length and exon number with the dispensability score**

171 Length and number of exons per gene were extracted from the Nd-1 annotation file.  
172 Linear mixed modelling was performed for gene length, exon number and the gene  
173 dispensability score for the whole dataset Ath-966 as well as for three large *A.*  
174 *thaliana* gene families (TAPscan (27)), namely MYBs (28), AP2/EREBP (29) and  
175 WRKYs (30) using Statsmodels v0.12.0 (26)  
176 ([https://github.com/ksielemann/QUOD/blob/master/mixed\\_linear\\_effects.py](https://github.com/ksielemann/QUOD/blob/master/mixed_linear_effects.py)).

177

#### 178 **Variation between replicates**

179 A total of 14 genomic datasets of the *A. thaliana* accession Col-0 were received from  
180 the SRA (Additional file 3) to assess the technical variation between replicates of the  
181 same accession. Col-0 was selected for this analysis, because multiple independent  
182 and high-quality datasets are only available for this accession. Each dataset was  
183 mapped to the TAIR10 reference genome sequence using BWA-MEM because a  
184 Col-0 read mapped against AthNd-1\_v2c would result in multiple differences caused



185by accession-specific differences. The mappings were then subjected to QUOD,  
186expecting a dispensability score close to one for each gene as there should be no  
187variability between datasets of the same accession. As the distributions are different  
188(Kolmogorov-Smirnov test,  $p \approx 3e-27$ ) and the sample size ( $n$ ) is high, the Levene's  
189test was selected to test for equal variances, regarding the gene dispensability  
190scores. The test was applied for (1) the dataset including replicates only and (2)  
191iteratively (100x), randomly chosen subsets ( $n=14$ ) of Ath-966  
192([https://github.com/ksielemann/QUOD/blob/master/variance\\_in\\_repl\\_test.py](https://github.com/ksielemann/QUOD/blob/master/variance_in_repl_test.py)).

193

#### 194 **Functional annotation**

195All genes of the *A. thaliana* Nd-1 genome sequence were annotated via reciprocal  
196best blast hits (RBHs) and best BLAST hits against Araport11 (19). Functional  
197enrichment analyses (PANTHER protein classes and 'biological process' GO terms)  
198were performed using the PANTHER Classification System of the Gene Ontology  
199(31).

200

#### 201 **Read mapper comparison**

202To evaluate the impact of the read mapping, the results of different mappers were  
203compared. In addition to BWA-MEM (v.0.7.13; see above) (17), Bowtie2 (v2.4.1;  
204default parameters) (32) and STAR (v2.5.1b) (33) were selected for this analysis.  
205STAR parameters required alignments with a similarity of at least 95% over at least  
20690% of the read pair length. The average coverage values per gene were  
207investigated for correlation using the Spearman correlation coefficient implemented in  
208the Python package SciPy (25).

209

## 210 **Data Availability**

211 The tool QUOD (QUOD.py) can be downloaded from GitHub  
212 (<https://github.com/ksielemann/QUOD>; <http://doi.org/10.5281/zenodo.4066818>). A  
213 data set to test QUOD is available on 'PUB - Publications at Bielefeld University'  
214 (<http://doi.org/10.4119/unibi/2946079>).

215

216

## 217 **Results**

218 In this study, a bioinformatic tool was developed to calculate a gene-specific  
219 dispensability score based on the normalised coverage in a read mapping. QUOD  
220 allows the quantification of dispensability by calculation of a single score for each  
221 gene (Figure 1). The binary classification of gene dispensability can be compared to  
222 the original method of mRNA detection by endpoint RT-PCR providing only  
223 qualitative results (34–36) which was replaced by quantitative analyses like RNA-  
224 Seq.

225

### 226 **Gene dispensability scores**

227 The gene dispensability score would initially be dependent on the sequencing depth  
228 per genome. By division of the average coverage of gene  $g$  in genome  $n$  ( $N$  = total  
229 number of investigated genome sequences) by the average coverage over all genes  
230 in genome  $n$ , the score is normalised for differences in the sequencing depth of the  
231 investigated genomes. A high value indicates that a gene is likely to be missing in

232some genomes and therefore more likely dispensable than a gene with a lower  
233dispensability score. Due to this quantification approach, this method is not based on  
234an arbitrary cutoff to determine the core genome and the dispensable genome of any  
235given pangenome dataset. An example: Using a cutoff of 'gene n occurs in at least  
23690 % of all genomes' to be considered a 'core' gene (dark blue), genes 1,2,4 and 6  
237(dark grey) would be considered 'dispensable' (Figure 1). However, considering the  
238coverage (right panel), it is not clear if e.g. gene 1 is truly biologically dispensable.  
239QUOD does not rely on any thresholds for the classification of genes into 'core' and  
240'dispensable', but provides a score based on the normalised coverage in a read  
241mapping. The genes could theoretically be ranked as well using the percentage of  
242presence/absence of a gene in the investigated genomes. However, this alternative  
243approach would still rely on a threshold, e.g. the number of mapped reads for a gene  
244to be considered present in a genome. This threshold is avoided using the QUOD  
245method.

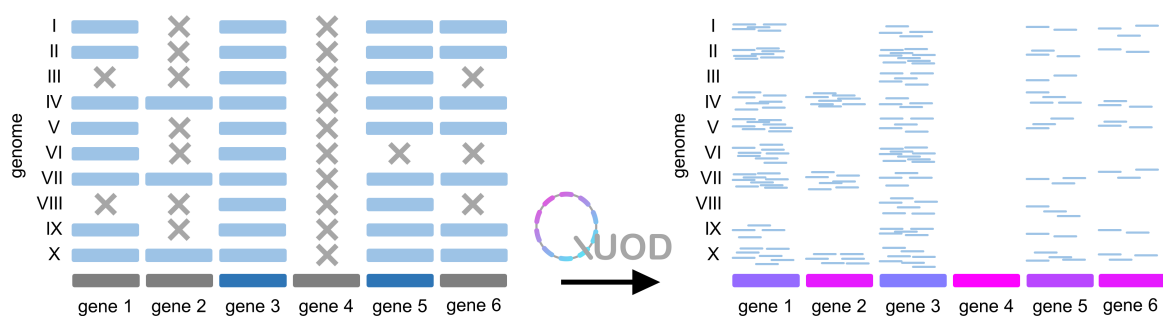

247Figure 1: Illustration of the QUOD method using a fictional dataset. On the left side,  
248genes are classified as 'core' (dark blue) or 'dispensable' (dark grey) according to a  
249cutoff. On the right side, gene dispensability is quantified according to a  
250dispensability score based on the normalised coverage in a read mapping (I-X:

251investigated genomes). Coloring of genes (right side) indicates different  
252dispensability scores. Extremely rare genes, which are absent from most genomes  
253but present in the reference, can be easily detected using QUOD.

254As a proof of concept, *A. thaliana* sequence reads of 1,135 accessions were mapped  
255to the *A. thaliana* Nd-1 genome sequence. All accessions with less than 10-fold read  
256coverage were discarded. The remaining sequencing dataset Ath-966 was analysed  
257with QUOD to calculate a dispensability score for each gene (Figure 2). Genes with  
258high dispensability scores, colored in pink, are considered to be likely dispensable,  
259whereas genes with dispensability scores close to one (dark purple/dark blue) are  
260considered to be core genes.

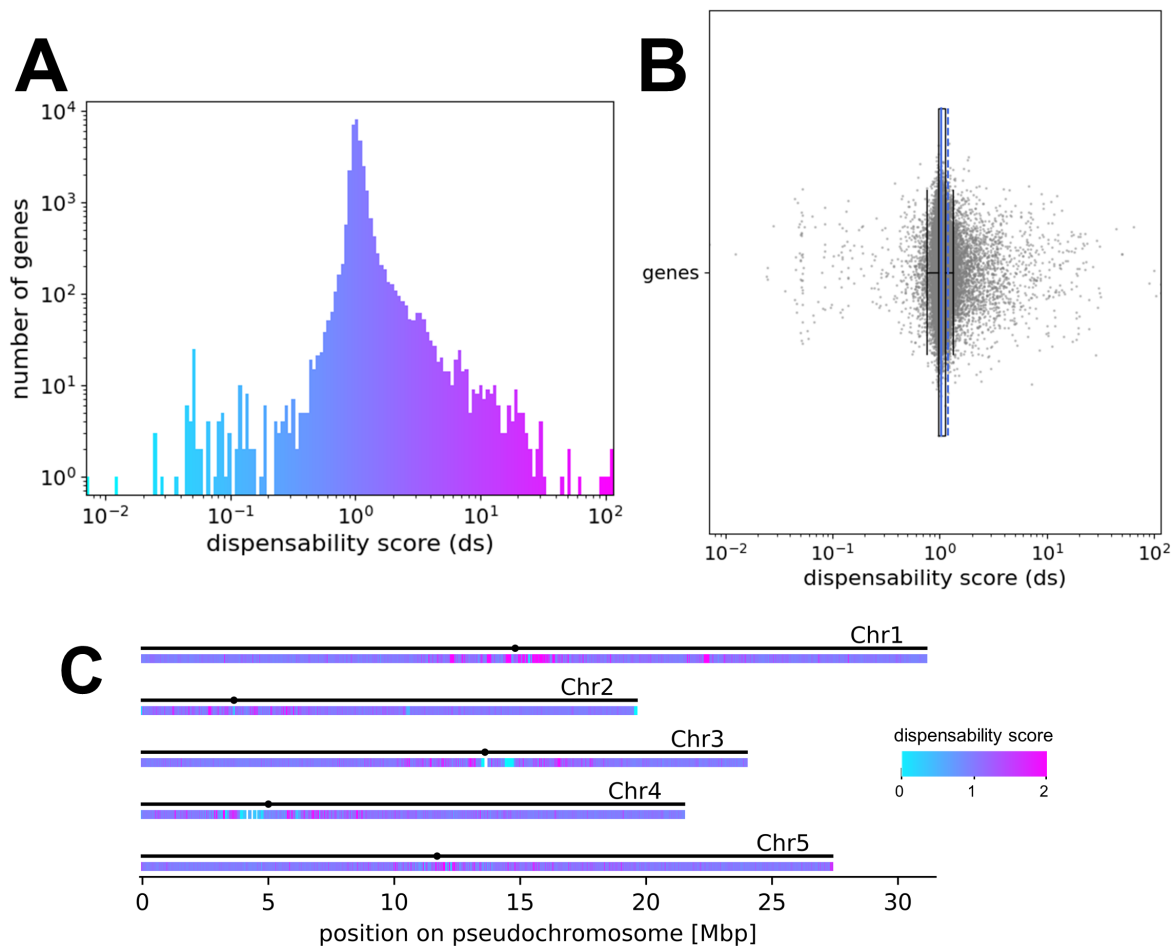

262 Figure 2: Distribution of the gene dispensability scores for Ath-966. A) Histogram  
263 coloured according to the dispensability score. The x-axis represents the  
264 dispensability score and the y-axis shows the number of genes in each bin in  
265 logarithmic scale. B) Box plot representing the dispensability score (x-axis) of all  
266 genes (y-axis). The mean is represented by the dashed blue line, the other blue line  
267 represents the median of the scores. C) Genome-wide distribution of genes with  
268 different dispensability scores in *A. thaliana* Nd-1. The coloured heatmap shows the  
269 respective gene dispensability scores. There are low (blue) and high (pink) scoring  
270 genes clustered in repetitive regions, including centromeric and telomeric areas. The  
271 x-axis represents the size (in Mbp) of each pseudochromosome in the assembly. The  
272 black dots represent the position of the centromeres of the five chromosomes in the  
273 AthNd1\_v2c assembly (19).

274

### 275 **Genome-wide distribution of the gene dispensability scores**

276 Next, the genome-wide distribution of genes with specific gene dispensability scores  
277 was investigated in *A. thaliana* (Figure 2C). A high plasticity between accessions,  
278 which means a high number of genes with exceptionally high and low scores (pink  
279 and blue), in the (peri-)centromeric regions is visible based on a heatmap (Figure  
280 2C).

281 As high and low scoring genes cluster in repetitive regions (mainly centromeres), the  
282 score distribution of TE genes was investigated (Additional file 4). Scores of TE  
283 genes are evenly distributed across all dispensability scores. In total, the mean score  
284 of TE genes (mean ds  $\approx$  1.501) is significantly higher when compared to non-TE  
285 genes (mean ds  $\approx$  1.168) (Mann-Whitney U test,  $p \approx 6E-8$ ), which are more frequent

286across scores close to one. Moreover, the minimal distance of each gene to its  
287closest TE gene and the dispensability scores revealed no relation (Additional file 4).

288To test the hypothesis whether genes with higher dispensability scores/more likely  
289dispensable genes are shorter and whether introns accumulate in core genes, the  
290correlation of the gene dispensability score with gene length and exon number,  
291respectively, were determined for the Ath-966 and for three selected gene families  
292separately. However, no clear trend was detectable (Additional file 5).

293

#### 294**Validation of the reliability**

295Validation of the reliability of the gene dispensability quantification was achieved by  
296comparison of BUSCOs and non-BUSCOs (Additional file 6). BUSCO genes show on  
297average slightly lower scores than non-BUSCO genes for all three reference datasets  
298( $p < 0.001$ , Mann-Whitney U test). Levene's test was used to test for equal variances.  
299The results show that the variances for all reference datasets differ significantly  
300between BUSCO and non-BUSCO genes ( $p < 0.001$ , Levene's test). Thus, the  
301deviation of the dispensability score from the respective mean is significantly higher  
302for non-BUSCO genes in comparison to BUSCO genes.

303Further, functional annotation of BUSCO outliers, which are genes of the 'brassicales  
304odb10' BUSCO gene set with dispensability scores below 0.75 or above 1.25,  
305revealed, amongst others, several repeat proteins, transmembrane proteins, a 'stress  
306induced protein', and multiple hypothetical proteins (Additional file 7).

307Genes with high and low gene dispensability scores were assessed in more detail.  
308Among genes with high dispensability scores, several significantly enriched  
309PANTHER protein classes were detected, e.g. defense/immunity and antimicrobial

310response proteins, small GTPases and G-proteins (Table 1). Among genes with  
 311dispensability scores < 0.8, genes encoding proteins of the extracellular matrix were  
 312significantly enriched (Table 1). 'Biological process' GO term enrichment revealed  
 313several significantly enriched terms associated with the regulation of cellular  
 314processes as well as associated with response to stimuli among genes with  
 315dispensability scores > 2 (Table 1). Genes with low dispensability scores show  
 316enrichment of primary metabolic processes (Table 1).

317

318Table 1: Closer investigation of genes with scores >2 and genes with scores < 0.8.  
 319Significantly enriched PANTHER protein classes (padj < 0.05) as well as significantly  
 320enriched GO biological process terms (padj < 0.05) are shown. Abbreviations: p =  
 321process, mp = metabolic process.

| <b>PANTHER protein classes (padj &lt; 0.05) of genes with scores &gt;2</b>     |          |
|--------------------------------------------------------------------------------|----------|
| small GTPase (PC00208)                                                         | 4.21E-05 |
| defense/immunity protein (PC00090)                                             | 4.24E-05 |
| antimicrobial response protein (PC00051)                                       | 5.24E-05 |
| G-protein (PC00020)                                                            | 4.05E-04 |
| protein class (PC00000)                                                        | 2.04E-03 |
| Unclassified                                                                   | 2.44E-03 |
| protein-binding activity modulator (PC00095)                                   | 3.72E-02 |
| <b>PANTHER protein classes (padj &lt; 0.05) of genes with scores &lt;0.8</b>   |          |
| extracellular matrix structural protein (PC00103)                              | 5.40E-06 |
| extracellular matrix protein (PC00102)                                         | 1.14E-05 |
| Unclassified                                                                   | 2.68E-05 |
| protein class (PC00000)                                                        | 3.57E-05 |
| metabolite interconversion enzyme (PC00262)                                    | 3.04E-02 |
| <b>GO biological process terms (padj &lt; 0.05) of genes with scores &gt;2</b> |          |
| cellular p (GO:0009987)                                                        | 2.62E-08 |
| mp (GO:0008152)                                                                | 4.62E-07 |
| cellular mp (GO:0044237)                                                       | 2.85E-06 |
| primary mp (GO:0044238)                                                        | 2.37E-05 |
| organic substance mp (GO:0071704)                                              | 3.02E-05 |
| regulation of cellular mp (GO:0031323)                                         | 9.82E-04 |

|                                                                                   |          |
|-----------------------------------------------------------------------------------|----------|
| regulation of biosynthetic p (GO:0009889)                                         | 9.92E-04 |
| regulation of cellular biosynthetic p (GO:0031326)                                | 1.04E-03 |
| regulation of cellular macromolecule biosynthetic p (GO:2000112)                  | 2.27E-03 |
| regulation of macromolecule biosynthetic p (GO:0010556)                           | 2.52E-03 |
| regulation of primary mp (GO:0080090)                                             | 2.90E-03 |
| macromolecule mp (GO:0043170)                                                     | 2.93E-03 |
| regulation of nitrogen compound mp (GO:0051171)                                   | 4.53E-03 |
| regulation of RNA mp (GO:0051252)                                                 | 4.69E-03 |
| positive regulation of biological p (GO:0048518)                                  | 4.89E-03 |
| response to organic substance (GO:0010033)                                        | 4.91E-03 |
| positive regulation of cellular p (GO:0048522)                                    | 6.62E-03 |
| regulation of RNA biosynthetic p (GO:2001141)                                     | 6.67E-03 |
| regulation of mp (GO:0019222)                                                     | 6.72E-03 |
| regulation of nucleobase-containing compound mp (GO:0019219)                      | 6.74E-03 |
| regulation of nucleic acid-templated transcription (GO:1903506)                   | 6.95E-03 |
| developmental p (GO:0032502)                                                      | 7.01E-03 |
| response to hormone (GO:0009725)                                                  | 7.25E-03 |
| regulation of transcription, DNA-templated (GO:0006355)                           | 7.27E-03 |
| response to oxygen-containing compound (GO:1901700)                               | 7.53E-03 |
| anatomical structure development (GO:0048856)                                     | 7.62E-03 |
| nitrogen compound mp (GO:0006807)                                                 | 1.25E-02 |
| response to endogenous stimulus (GO:0009719)                                      | 1.48E-02 |
| regulation of gene expression (GO:0010468)                                        | 2.91E-02 |
| system development (GO:0048731)                                                   | 3.44E-02 |
| regulation of macromolecule mp (GO:0060255)                                       | 3.45E-02 |
| cellular lipid mp (GO:0044255)                                                    | 4.10E-02 |
| clathrin coat disassembly (GO:0072318)                                            | 4.14E-02 |
| multicellular organismal p (GO:0032501)                                           | 4.19E-02 |
| vesicle uncoating (GO:0072319)                                                    | 4.26E-02 |
| <b>GO biological process terms (padj &lt; 0.05) of genes with scores &lt; 0.8</b> |          |
| cellular p (GO:0009987)                                                           | 6.35E-07 |
| mp (GO:0008152)                                                                   | 1.35E-06 |
| organic substance mp (GO:0071704)                                                 | 8.49E-06 |
| cellular mp (GO:0044237)                                                          | 2.92E-05 |
| nitrogen compound mp (GO:0006807)                                                 | 5.35E-04 |
| primary mp (GO:0044238)                                                           | 5.76E-04 |
| macromolecule mp (GO:0043170)                                                     | 3.82E-03 |
| organonitrogen compound mp (GO:1901564)                                           | 9.67E-03 |
| localization (GO:0051179)                                                         | 4.87E-02 |

322



323The function of the 100 genes with the highest gene dispensability scores was  
324examined in detail for Ath-966 (Additional file 8). Fourteen genes of Ath-966 are  
325annotated as “disease resistance proteins”, whereas seven genes are annotated as  
326transposons/transposases. Four genes are described as hypothetical proteins and 24  
327genes have no functional annotation. In addition, an example for lineage specific  
328adaptation is provided (Additional file 9). The gene NdCChr1.g3308 has a  
329dispensability score of approx. 10. For 870 accessions, which account for approx. 90  
330% of Ath-966, no coverage was detected. The gene is annotated as resistance gene  
331mediating resistance against the bacterial pathogen *Pseudomonas syringae*.

332Next, the variation between replicates of the same accession (Col-0) was determined  
333(Additional file 10). The variation of the gene dispensability score distribution of the  
334replicate dataset (one accession) ( $\sigma^2 \approx 0.0226$ ) is significantly lower than the variation  
335between all iteratively, randomly selected subsets of *A. thaliana* accessions ( $\sigma^2 \approx$   
3360.0392) (Levene’s test,  $p \approx 4e-19$ ). The average coverage per gene using different  
337read mappers revealed strong correlations in all comparisons (Additional file 11). The  
338coverage correlations, calculated using Spearman correlation coefficient, between  
339BWA-MEM and bowtie2 ( $r \approx 0.810$ ,  $p \approx 0.0$ ), BWA-MEM and STAR ( $r \approx 0.814$ ,  $p \approx$   
3400.0) as well as bowtie2 and STAR ( $r \approx 0.760$ ,  $p \approx 0.0$ ) are similar.

341

342

### 343Discussion

344QUOD was developed for the quantification of gene dispensability in plant  
345pangenome datasets. Multiple accessions of several plant species have been  
346sequenced and pose potential use cases for QUOD (Additional file 12). Dropping

347sequencing costs will lead to an increasing availability of comprehensive sequence  
348datasets which would permit the application of QUOD. Additionally, QUOD is not  
349restricted to plants, but could be applied to other species (e.g. pig (37)). However,  
350an accurate determination of gene dispensability scores free of systematic biases  
351might rely on a uniform selection of genomes from the respective taxonomic group  
352and on uniform read coverage of genes. In addition, non-random fragmentation of  
353DNA prior to sequencing (38) may cause biases. The variation among replicates of  
354the same accession (Col-0;  $\sigma^2 \approx 0.0226$ ) might be attributed to technical biases, e.g.  
355during sequencing library preparation. The comparison of different read mappers  
356revealed a significant correlation for the average coverage per gene. Outlier samples,  
357detected by the investigation of the average coverage per gene using different read  
358mappers, might indicate technical issues. Even though the correlations are strong,  
359the same tool with the same parameter settings needs to be used for the read  
360mapping of all compared datasets within one single QUOD run.

361Most genes show dispensability scores close to one as the majority of genes are  
362widespread across species. The aim of QUOD is mainly the identification of the  
363‘outliers’ and therefore the more dispensable genes, which are genes not present in  
364all genomes. These dispensable genes represent a smaller fraction of the genome  
365than the core genes. Genome level patterns are expected to be similar for all  
366species. Further, QUOD is not an alternative to PAV detection methods as groups of  
367genes can still always be defined using PAV methods, but QUOD provides a  
368quantitative measurement for these cases.

369As already stated in the Introduction, genome assemblies might be incomplete  
370leading to artificially missing genes (15). One way to circumvent this is to rely on a  
371high-quality reference genome sequence, thus avoiding additional assemblies which

372 are potential sources of errors. Recently released telomere-to-telomere assemblies  
373 indicate that these resources will be available for many plant species in the near  
374 future (39). Further, the usage of QUOD with a synthetic reference derived from  
375 multiple assemblies is possible and can be implemented in the future. A graph-based  
376 assembly of a pangenome comprising multiple accessions is already feasible for  
377 bacteria (40–42). However, for large plant genome sequences graph-based  
378 pangenome assembly is computationally expensive and not yet robust for complex  
379 structural variants like inversions(43). Even though there are still several  
380 shortcomings, like loss of the sample information (44), improved methods might be  
381 available in the near future and could be used for the improved quantification of gene  
382 dispensability.

383

#### 384 **Genome-wide distribution of the gene dispensability scores**

385 The genome-wide distribution of all gene dispensability scores (not only BUSCO  
386 genes) of the *A. thaliana* genomes reveals the origin of exceptionally low  
387 dispensability scores (Figure 2). Low scoring genes, which are colored in light blue  
388 in Figure 2, might be TEs and other repeat genes associated with collapsed  
389 sequences in the assembly. An accurate determination of the dispensability scores of  
390 these genes might be possible using ideal genome sequences without any collapsed  
391 regions and with specific read mappings e.g. using high quality long reads. However,  
392 low scoring genes could still be useful to determine amplified TEs and other repeat  
393 genes. Moreover, the genome-wide distribution plot (Figure 2C) shows that high and  
394 low scoring genes cluster in repetitive regions, like centromeres or telomeres. Very  
395 similar sequences, e.g. members of a gene family or close paralogs, might cause  
396 read mapping errors confounding biases in the dispensability scores of these genes.

397 Additionally, this can be explained by variation in the recombination rate (45) and  
398 active TEs in these regions. It was previously proposed, that dispensable genes are  
399 likely located closer to TEs which are important factors in genome evolution (9).  
400 However, in the results of our study, TE genes are widely distributed across all  
401 dispensability scores as TEs can occur with variable copy numbers in genomes  
402 leading to low scores and can as well be dispensable. Other studies detected a high  
403 number of TEs in the dispensable genome (46). However, it is possible that only  
404 certain TE families might be truly dispensable. One limitation is the accurate  
405 assignment of reads to repetitive sections of the reference sequence during the read  
406 mapping (15). Further, only a fraction of transposons might be correctly assembled  
407 and annotated due to several computational challenges in highly repetitive and peri-  
408 centromeric regions (47). Therefore, a different strategy might be needed to  
409 accurately quantify dispensability of TEs. A high quality annotation of transposons  
410 and a following exclusion of these genes from the analysis or improved read mapping  
411 to the consensus sequence might improve the results. Again, long reads could be an  
412 alternative solution to handle regions which might be ambiguous in read mappings.  
413 Moreover, heterochromatin or genome-purging mechanisms (48) could influence the  
414 gene dispensability scores in these regions.

415 Additionally some of the low scoring genes were flagged as plastid-like sequences as  
416 original sequencing data from plants contain high amounts of reads originating from  
417 plastid sequences (49,50). Biases due to this plastid read contamination inflate the  
418 coverage of sequences with high similarity to plastid sequences, resulting in an  
419 exceptionally low gene dispensability score.

420

421 **Validation of the reliability**

422 We validated the reliability of the gene dispensability score by showing that more  
423 conserved BUSCO genes get significantly lower dispensability scores than non-  
424 BUSCO genes (Additional file 6). Based on the distribution of the scores in the violin  
425 plot (Additional file 6), the difference between BUSCOs and non-BUSCOs appears  
426 small, even though the difference is significant (U test,  $p \approx 4E-113$ , brassicales  
427 reference). It is important to note that non-BUSCO genes can be highly conserved.  
428 Consequently, the difference is only visible at the group level. The difference in the  
429 dispensability scores of BUSCOs and non-BUSCOs is low as expected, because  
430 conserved multiple-copy genes are not included in the BUSCO gene set (21).  
431 Therefore, the variance of the dispensability scores of non-BUSCO genes is  
432 significantly larger than the variance among BUSCO genes: non-BUSCO genes  
433 comprise highly conserved multi-copy genes as well as less conserved genes.  
434 Further, functional annotation of BUSCO outliers revealed several repeat proteins  
435 and transmembrane proteins. Repeat proteins might lead to read mapping errors and  
436 consequently artificial variations in coverage and dispensability scores.  
437 Transmembrane proteins are thought to be involved in biotic stress response and  
438 might not be essential for some accessions and therefore dispensable (51). This  
439 could explain the absence in some genomes resulting in high dispensability scores of  
440 these genes. Therefore, many important, lower-scoring genes might lie outside of the  
441 BUSCO reference set.

442 Functional annotation of the 100 most likely dispensable genes revealed a high  
443 number of uncharacterised proteins, disease resistance proteins as well as  
444 transposons and transposases in the *A. thaliana* genomes. It is possible that these  
445 genes are undergoing pseudogenization and have not been functionally annotated  
446 due to the lack of a visible phenotype when mutated. TEs were detected in other

447 studies as contributors to large structural variations between species and individuals  
448 and considered as a substantial part of the dispensable genome (46). Previous  
449 pangenome analyses also revealed that the dispensable genome comprises  
450 functions like ‘defense response’, ‘diseases resistance’, ‘flowering time’ and  
451 ‘adaptation to biotic and abiotic stress’ (9,11,13). Comparable results were detected  
452 for the enriched protein classes and ‘biological process’ GO terms (Table 1), even  
453 though very general terms, like ‘protein class’, give little evidence about the function  
454 of genes. Moreover, we provide a specific example for lineage specific adaptation  
455 associated with a high dispensability score (Additional file 9): a gene mediating  
456 resistance against the bacterial pathogen *Pseudomonas syringae*. Therefore, in  
457 depth investigation of genes with high dispensability scores can result in the  
458 identification and characterization of phenotypic variation (52) and important  
459 agronomic traits (13). We envision several applications for the gene dispensability  
460 score generated by QUOD: (1) more accurate prediction if a gene is associated with  
461 a specific trait, (2) development of dependency gene networks, and (3) improved  
462 modeling of the evolutionary value of genes.

463

464

## 465 **Conclusions**

466 QUOD (reference-based QUantification Of gene Dispensability) overcomes the  
467 problem of labeling genes as ‘core’ or ‘dispensable’ through implementation of a  
468 quantification approach. Instead of a distinct classification, QUOD provides a ranking  
469 of all genes based on assigned gene-specific dispensability scores and therefore  
470 does not rely on any thresholds.

471

472

### 473 **Declarations**

#### 474 **Ethics approval and consent to participate**

475 Not applicable.

#### 476 **Consent for publication**

477 Not applicable.

#### 478 **Availability of data and materials**

479 The tool QUOD for the reference-based QUantification Of gene Dispensability

480 (QUOD.py) can be downloaded from GitHub (<https://github.com/ksielemann/QUOD>;

481 <http://doi.org/10.5281/zenodo.4066818>).

#### 482 **Competing interests**

483 The authors declare that they have no competing interests.

#### 484 **Funding**

485 KS is funded by Bielefeld University.

#### 486 **Authors' contributions**

487 KS, BW and BP designed the study, performed the experiments, analysed the data,

488 and wrote the manuscript. All authors read and approved the final version of this

489 manuscript.

#### 490 **Acknowledgements**

491 We thank members of Genetics and Genomics of Plants for discussion of preliminary  
492 results. We are very grateful to Janik Sielemann and Nathanael Walker-Hale for  
493 helpful comments on the manuscript. We acknowledge support for the Article  
494 Processing Charge by the Deutsche Forschungsgemeinschaft and the Open Access  
495 Publication Fund of Bielefeld University. We thank the CeBiTec Bioinformatic  
496 Resource Facility team for great technical support.

497

498

## 499 **References**

5001. Springer NM, Ying K, Fu Y, Ji T, Yeh C-T, Jia Y, et al. Maize Inbreds Exhibit  
501 High Levels of Copy Number Variation (CNV) and Presence/Absence Variation  
502 (PAV) in Genome Content. Ecker JR, editor. PLoS Genet. 2009 Nov  
503 20;5(11):e1000734.
5042. Scherer SW, Lee C, Birney E, Altshuler DM, Eichler EE, Carter NP, et al.  
505 Challenges and standards in integrating surveys of structural variation. Nat  
506 Genet. 2007 Jul;39(S7):S7–15.
5073. Tao Y, Zhao X, Mace E, Henry R, Jordan D. Exploring and Exploiting Pan-  
508 genomics for Crop Improvement. Molecular Plant. 2019 Feb;12(2):156–69.
5094. Lu F, Romay MC, Glaubitz JC, Bradbury PJ, Elshire RJ, Wang T, et al. High-  
510 resolution genetic mapping of maize pan-genome sequence anchors. Nat  
511 Commun. 2015 Nov;6(1):6914.



5125. Swanson-Wagner RA, Eichten SR, Kumari S, Tiffin P, Stein JC, Ware D, et al.  
513 Pervasive gene content variation and copy number variation in maize and its  
514 undomesticated progenitor. *Genome Research*. 2010 Dec 1;20(12):1689–99.
5156. Tettelin H, Massignani V, Cieslewicz MJ, Donati C, Medini D, Ward NL, et al.  
516 Genome analysis of multiple pathogenic isolates of *Streptococcus agalactiae*:  
517 Implications for the microbial ‘pan-genome’. *Proceedings of the National*  
518 *Academy of Sciences*. 2005 Sep 27;102(39):13950–5.
5197. Vernikos G, Medini D, Riley DR, Tettelin H. Ten years of pan-genome analyses.  
520 *Current Opinion in Microbiology*. 2015 Feb;23:148–54.
5218. Golicz AA, Batley J, Edwards D. Towards plant pangenomics. *Plant Biotechnol*  
522 *J*. 2016 Apr;14(4):1099–105.
5239. Gordon SP, Contreras-Moreira B, Woods DP, Des Marais DL, Burgess D, Shu  
524 S, et al. Extensive gene content variation in the *Brachypodium distachyon* pan-  
525 genome correlates with population structure. *Nat Commun*. 2017 Dec;8(1):2184.
52610. Li Y, Zhou G, Ma J, Jiang W, Jin L, Zhang Z, et al. De novo assembly of  
527 soybean wild relatives for pan-genome analysis of diversity and agronomic traits.  
528 *Nat Biotechnol*. 2014 Oct;32(10):1045–52.
52911. Zhao Q, Feng Q, Lu H, Li Y, Wang A, Tian Q, et al. Pan-genome analysis  
530 highlights the extent of genomic variation in cultivated and wild rice. *Nat Genet*.  
531 2018 Feb;50(2):278–84.
53212. Marroni F, Pinosio S, Morgante M. Structural variation and genome complexity:  
533 is dispensable really dispensable? *Current Opinion in Plant Biology*. 2014  
534 Apr;18:31–6.

53513. Golicz AA, Bayer PE, Barker GC, Edger PP, Kim H, Martinez PA, et al. The  
536 pangenome of an agronomically important crop plant *Brassica oleracea*. *Nat*  
537 *Commun.* 2016 Dec;7(1):13390.
53814. Liu Y, Du H, Li P, Shen Y, Peng H, Liu S, et al. Pan-Genome of Wild and  
539 Cultivated Soybeans. *Cell.* 2020 Jul;182(1):162-176.e13.
54015. Alkan C, Sajjadian S, Eichler EE. Limitations of next-generation genome  
541 sequence assembly. *Nat Methods.* 2011 Jan;8(1):61–5.
54216. Leinonen, Rasko and Sugawara, Hideaki and Shumway, Martin and  
543 International Nucleotide Sequence Database Collaboration. The sequence read  
544 archive. *Nucleic Acids Research.* 2010;39(suppl\_1):D19–D21.
54517. Li H. Aligning sequence reads, clone sequences and assembly contigs with  
546 BWA-MEM. arXiv preprint arXiv:13033997. 2013;
54718. Alonso-Blanco C, Andrade J, Becker C, Bemm F, Bergelson J, Borgwardt KM, et  
548 al. 1,135 Genomes Reveal the Global Pattern of Polymorphism in *Arabidopsis*  
549 *thaliana*. *Cell.* 2016 Jul;166(2):481–91.
55019. Pucker B, Holtgräwe D, Stadermann KB, Frey K, Huettel B, Reinhardt R, et al. A  
551 chromosome-level sequence assembly reveals the structure of the *Arabidopsis*  
552 *thaliana* Nd-1 genome and its gene set. Feltus FA, editor. *PLoS ONE.* 2019 May  
553 21;14(5):e0216233.
55420. Altschul SF, Gish W, Miller W, Myers EW, Lipman DJ. Basic local alignment  
555 search tool. *Journal of Molecular Biology.* 1990 Oct;215(3):403–10.

55621. Simão, Felipe A and Waterhouse, Robert M and Ioannidis, Panagiotis and  
557 Kriventseva, Evgenia V and Zdobnov, Evgeny M. BUSCO: assessing genome  
558 assembly and annotation completeness with single-copy orthologs.  
559 *Bioinformatics*. 2015;31(19):3210–3212.
56022. Zdobnov EM, Tegenfeldt F, Kuznetsov D, Waterhouse RM, Simão FA, Ioannidis  
561 P, et al. OrthoDB v9.1: cataloging evolutionary and functional annotations for  
562 animal, fungal, plant, archaeal, bacterial and viral orthologs. *Nucleic Acids Res*.  
563 2017 Jan 4;45(D1):D744–9.
56423. Hunter JD. Matplotlib: A 2D Graphics Environment. *Comput Sci Eng*.  
565 2007;9(3):90–5.
56624. Ho J, Tumkaya T, Aryal S, Choi H, Claridge-Chang A. Moving beyond P values:  
567 data analysis with estimation graphics. *Nat Methods*. 2019 Jul;16(7):565–6.
56825. Jones E, Oliphant T, Peterson P, others. SciPy: Open source scientific tools for  
569 Python. 2001;
57026. Seabold S, Perktold J. Statsmodels: Econometric and statistical modeling with  
571 python. *Proceedings of the 9th Python in Science Conference*. 2010;57.
57227. Wilhelmsson PKI, Mühlich C, Ullrich KK, Rensing SA. Comprehensive Genome-  
573 Wide Classification Reveals That Many Plant-Specific Transcription Factors  
574 Evolved in Streptophyte Algae. *Genome Biology and Evolution*. 2017 Dec  
575 1;9(12):3384–97.
57628. Stracke R, Werber M, Weisshaar B. The R2R3-MYB gene family in *Arabidopsis*  
577 *thaliana*. *Current Opinion in Plant Biology*. 2001 Oct;4(5):447–56.

57829. Feng J-X, Liu D, Pan Y, Gong W, Ma L-G, Luo J-C, et al. An annotation update  
579 via cDNA sequence analysis and comprehensive profiling of developmental,  
580 hormonal or environmental responsiveness of the Arabidopsis AP2/EREBP  
581 transcription factor gene family. *Plant Molecular Biology*. 2005 Dec;59(6):853–  
582 68.
58330. Eulgem T, Rushton PJ, Robatzek S, Somssich IE. The WRKY superfamily of  
584 plant transcription factors. *Trends in Plant Science*. 2000 May;5(5):199–206.
58531. Carbon, Seth, Mungall, Chris. Gene Ontology Data Archive [Internet]. Zenodo;  
586 2018 [cited 2020 Sep 29]. Available from: <https://zenodo.org/record/3980761>
58732. Langmead B, Salzberg SL. Fast gapped-read alignment with Bowtie 2. *Nat*  
588 *Methods*. 2012 Apr;9(4):357–9.
58933. Dobin A, Davis CA, Schlesinger F, Drenkow J, Zaleski C, Jha S, et al. STAR:  
590 ultrafast universal RNA-seq aligner. *Bioinformatics*. 2013;29(1):15–21.
59134. Wang AM, Doyle MV, Mark DF. Quantitation of mRNA by the polymerase chain  
592 reaction. *Proceedings of the National Academy of Sciences*. 1989 Dec  
593 1;86(24):9717–21.
59435. Gilliland G, Perrin S, Blanchard K, Bunn HF. Analysis of cytokine mRNA and  
595 DNA: detection and quantitation by competitive polymerase chain reaction.  
596 *Proceedings of the National Academy of Sciences*. 1990;87(7):2725–9.
59736. Chiang PW, Song WJ, Wu KY, Korenberg JR, Fogel EJ, Van Keuren ML, et al.  
598 Use of a fluorescent-PCR reaction to detect genomic sequence copy number  
599 and transcriptional abundance. *Genome Research*. 1996 Oct 1;6(10):1013–26.

60037. Tian X, Li R, Fu W, Li Y, Wang X, Li M, et al. Building a sequence map of the pig  
601 pan-genome from multiple de novo assemblies and Hi-C data. *Sci China Life*  
602 *Sci.* 2020 May;63(5):750–63.
60338. Poptsova MS, Il'icheva IA, Nechipurenko DYU, Panchenko LA, Khodikov MV,  
604 Oparina NY, et al. Non-random DNA fragmentation in next-generation  
605 sequencing. *Sci Rep.* 2015 May;4(1):4532.
60639. Miga KH, Koren S, Rhie A, Vollger MR, Gershman A, Bzikadze A, et al.  
607 Telomere-to-telomere assembly of a complete human X chromosome. *Nature.*  
608 2020 Sep 3;585(7823):79–84.
60940. Gautreau G, Bazin A, Gachet M, Planel R, Burlot L, Dubois M, et al.  
610 PPanGGOLiN: Depicting microbial diversity via a partitioned pangenome graph.  
611 Ouzounis CA, editor. *PLoS Comput Biol.* 2020 Mar 19;16(3):e1007732.
61241. Ding W, Baumdicker F, Neher RA. panX: pan-genome analysis and exploration.  
613 *Nucleic Acids Research.* 2018 Jan 9;46(1):e5–e5.
61442. Chan AP, Sutton G, DePew J, Krishnakumar R, Choi Y, Huang X-Z, et al. A  
615 novel method of consensus pan-chromosome assembly and large-scale  
616 comparative analysis reveal the highly flexible pan-genome of *Acinetobacter*  
617 *baumannii*. *Genome Biol.* 2015 Dec;16(1):143.
61843. Chen N-C, Solomon B, Mun T, Iyer S, Langmead B. Reducing reference bias  
619 using multiple population reference genomes [Internet]. *Bioinformatics*; 2020  
620 Mar [cited 2020 Sep 29]. Available from:  
621 <http://biorxiv.org/lookup/doi/10.1101/2020.03.03.975219>

62244. Li H, Feng X, Chu C. The design and construction of reference pangenome  
623 graphs. arXiv:200306079 [q-bio] [Internet]. 2020 Mar 12 [cited 2020 Sep 29];  
624 Available from: <http://arxiv.org/abs/2003.06079>
62545. Nachman M. Variation in recombination rate across the genome: evidence and  
626 implications. *Current Opinion in Genetics & Development*. 2002 Dec  
627 1;12(6):657–63.
62846. Morgante M, Depaoli E, Radovic S. Transposable elements and the plant pan-  
629 genomes. *Current Opinion in Plant Biology*. 2007 Apr;10(2):149–55.
63047. Platt RN, Blanco-Berdugo L, Ray DA. Accurate Transposable Element  
631 Annotation Is Vital When Analyzing New Genome Assemblies. *Genome Biol  
632 Evol*. 2016 Feb;8(2):403–10.
63348. Lee S-I, Kim N-S. Transposable Elements and Genome Size Variations in  
634 Plants. *Genomics Inform*. 2014;12(3):87.
63549. Yu J, Hu S, Wang J, Wong GK-S, Li S, Liu B, et al. A draft sequence of the rice  
636 genome (*Oryza sativa* L. ssp. *indica*). *Science*. 2002 Apr 5;296(5565):79–92.
63750. Tang J, Xia H, Cao M, Zhang X, Zeng W, Hu S, et al. A Comparison of Rice  
638 Chloroplast Genomes. *Plant Physiol*. 2004 May;135(1):412–20.
63951. Dodds PN, Rathjen JP. Plant immunity: towards an integrated view of plant–  
640 pathogen interactions. *Nat Rev Genet*. 2010 Aug;11(8):539–48.
64152. Hirsch CN, Foerster JM, Johnson JM, Sekhon RS, Muttoni G, Vaillancourt B, et  
642 al. Insights into the Maize Pan-Genome and Pan-Transcriptome. *Plant Cell*.  
643 2014 Jan;26(1):121–35.

644

645

646

### 647 **Additional files**

648 Additional file 1 (.tsv): SRA IDs of datasets downloaded to conduct the QUOD  
649 analysis of the *A. thaliana* genomes.

650 Additional file 2 (.pdf): Illustration of the different components of QUOD.

651 Additional file 3 (.tsv): SRA/ENA IDs of datasets downloaded to conduct the analysis  
652 of replicates (Col-0).

653 Additional file 4 (.pdf): Distribution of scores of TE genes and non-TE genes and  
654 correlation of the distance to the closest TE gene with the gene dispensability score  
655 of the *A. thaliana* genomes.

656 Additional file 5 (.pdf): Correlation of gene length and exon number with the  
657 dispensability scores of the *A. thaliana* genomes.

658 Additional file 6 (.pdf): Comparison of BUSCO analyses for 'chlorophyta',  
659 'brassicales' and 'embryophyta' as reference.

660 Additional file 7 (.tsv): Functional annotation of BUSCO outliers (using 'brassicales  
661 odb10' as reference) with a dispensability score smaller than 0.75 or greater than  
662 1.25.

663 Additional file 8 (.tsv): Functional annotation of the 100 most likely dispensable genes  
664 of the *A. thaliana* genomes.

665 Additional file 9 (.pdf): Example for lineage specific adaptation.

666Additional file 10 (.pdf): Analysis of variance of the gene dispensability score  
667calculated for replicates of the *A. thaliana* Col-0 accession and iteratively, randomly  
668chosen subsets of the whole dataset Ath-966.

669Additional file 11 (.pdf): Correlation of the average coverage per gene using three  
670different read mappers: BWA-MEM, bowtie2 and STAR.

671Additional file 12 (.tsv): Examples of diploid species where multiple cultivars were  
672already sequenced.
