# Supplementary material for: Reference-based QUantification Of gene Dispensability (QUOD)
Source: bioRxiv or medRxiv preprint supplement (doi:10.1101/2020.04.28.065714), 2020-11-27
Supplement: Supplementary file [file media-9.pdf]

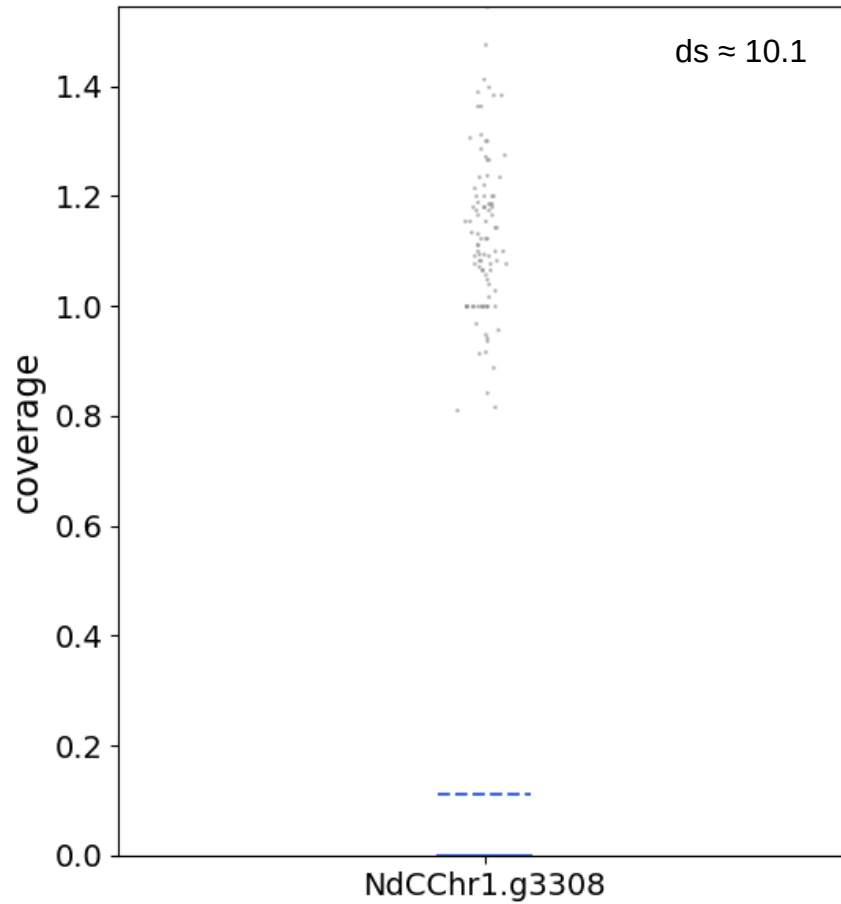

**Figure S9:** Example for lineage specific adaptation. The gene NdCChr1.g3308 (Nd-1 annotation nomenclature) ( $ds \approx 10.1$ ) has zero coverage in 870 accessions ( $\approx 90\%$ ) and is annotated as resistance gene mediating resistance against the bacterial pathogen *Pseudomonas syringae*.
