# Supplementary material for: Reference-based QUantification Of gene Dispensability (QUOD)
Source: bioRxiv or medRxiv preprint supplement (doi:10.1101/2020.04.28.065714), 2020-11-27
Supplement: Supplementary file [file media-11.pdf]

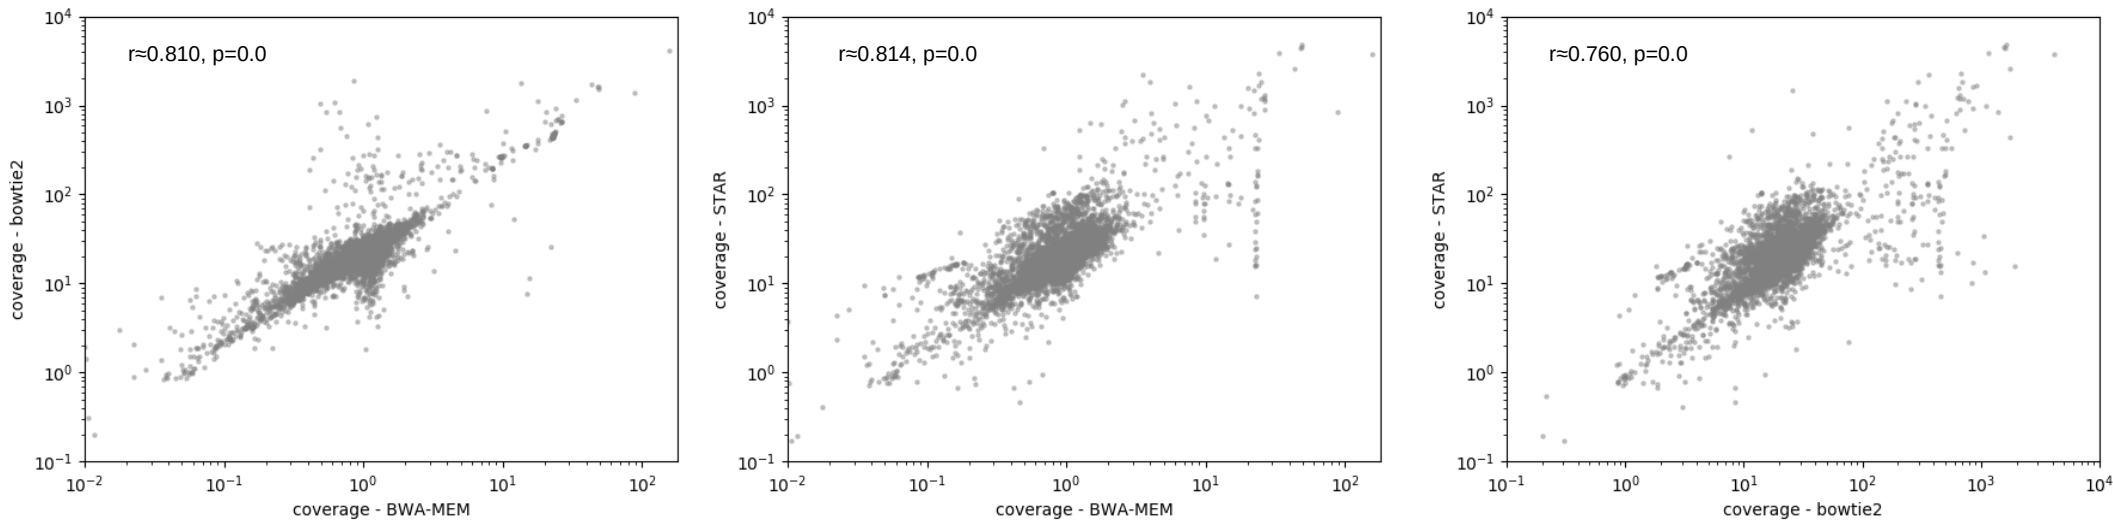

**Figure S11:** Coverage comparison using different read mappers (BWA\_MEM, bowtie2, STAR). Spearman correlation coefficient was used to determine the correlation and the significance of the results. The coverages of the genes using different mappers correlate significantly.
